# Supplementary material for: A review of lipase immobilization on hydrophobic supports incorporating systematic mapping principles
Source: Royal Society of Chemistry journal article supplement (doi:10.1039/d3re00420a), 2023-01-01
Supplement: d3re00420a1.pdf [file d3re00420a1.pdf]

## A REVIEW ON LIPASE IMMOBILIZATION ON HYDROPHOBIC SUPPORTS INCORPORATING SYSTEMATIC MAPPING PRINCIPLES

José Renato Guimarães<sup>1,2</sup>, Kaíque Souza Gonçalves Cordeiro Oliveira<sup>1</sup>, Maria Carolina Pereira Gonçalves<sup>1</sup>, João Paulo Ramanelli<sup>3</sup>, Laiane Antunes Lopes<sup>1</sup>, Ángel Berenguer-Murcia<sup>4</sup>, Roberto Fernandez-Lafuente<sup>5\*</sup> and Paulo Waldir Tardioli<sup>1,\*</sup>

<sup>1</sup> Graduate Program in Chemical Engineering (PPGEQ), Laboratory of Enzyme Technologies (LabEnz), Department of Chemical Engineering, Federal University of São Carlos (DEQ/UFSCar), Rod. Washington Luís, km 235, 13565-905 São Carlos, SP, Brazil; jrenatoguimaraes@unifei.edu.br (J.R.G.); lettypassos@gmail.com (L.P.M.); renatofcbento@hotmail.com (R. F. C. B.); pwtardioli@ufscar.br (P.W.T.)

<sup>2</sup> Institute of Natural Resources, Graduate in Bioprocess Engineering, Laboratory of Fermentative and Enzymatic Processes (LPEFenz), Federal University of Itajubá, Av. Benedito Pereira dos Santos, 1303, 37500-903, Itajubá, MG, Brazil; jrenatoguimaraes@unifei.edu.br (J.R.G.);

<sup>3</sup> Laboratory of Ecology and Forest Restoration, Department of Forest Sciences, “Luiz de Queiroz” College of Agriculture, University of São Paulo, 11 Av. Pádua Dias, 13418-900 Piracicaba, SP, Brazil

<sup>4</sup> Departamento de Química Inorgánica e Instituto Universitario de Materiales, Universidad de Alicante, 03080 Alicante, Spain; a.berenguer@ua.es (A.B.-M.)

<sup>5</sup> Departamento de Biocatálisis, ICP-CSIC, Campus UAM-CSIC, 28049 Madrid, Spain; rfl@icp.csic.es (R.F.-L.)

\* Correspondence: pwtardioli@ufscar.br (P.W.T.); [rfl@icp.csic.es](mailto:rfl@icp.csic.es) (R.F.-L.); Tel: +55-16-3351-9362 (P.W.T.), +34-91594804 (R.F.-L.)

## SUPPLEMENTARY MATERIAL

Table S1. Search strategy for locating articles. All searches were undertaken on April 26<sup>th</sup>, 2021.

| Bibliographic sources                | Search String                                                                                                                                                                                                                                                                                                                                                                       |
|--------------------------------------|-------------------------------------------------------------------------------------------------------------------------------------------------------------------------------------------------------------------------------------------------------------------------------------------------------------------------------------------------------------------------------------|
| Searched terms (2011-2020, Articles) | "interfacial activation*" OR "activation immobilization*" OR "interfacial Immobilization*" OR "interfacial activation immobilization*" OR "interfacial adsorption*" OR "adsorption immobilization*" OR "hydrophobic adsorption*" OR "hydrophobic immobilization*" OR "hydrophobic adsorption immobilization*" OR "hydrophobic support*" OR "Hydrophobic interaction*" AND "lipase*" |
| Web of Science                       | Basic search: TOPIC (Core collection: SCI-E, ESCI)<br><b>644 records</b>                                                                                                                                                                                                                                                                                                            |
| Scopus                               | Basic search: TITLE-ABSTRACT-KEYWORDS<br><b>368 records</b>                                                                                                                                                                                                                                                                                                                         |
| PubMed                               | Basic search: ALL FIELDS<br><b>843 records</b>                                                                                                                                                                                                                                                                                                                                      |
| SciELO                               | Basic search: TOPIC (Citation Index)<br><b>No records</b>                                                                                                                                                                                                                                                                                                                           |
| <b>Total records</b>                 | 1855                                                                                                                                                                                                                                                                                                                                                                                |

Table S2. Records eliminated after title/abstract screening.

| Categories                                                                            | Number of publications |
|---------------------------------------------------------------------------------------|------------------------|
| Reviews                                                                               | 182                    |
| Application of free enzymes in bioprocesses                                           | 48                     |
| Lipase production without immobilization or immobilized in the whole cell             | 28                     |
| Immobilization of other enzymes ( $\alpha$ -amylase, protease, laccase, among others) | 58                     |
| Use of lipase for medical processes                                                   | 36                     |
| General studies with free enzymes                                                     | 329                    |
| Use of commercial immobilized enzymes                                                 | 14                     |
| Surface modification of the free lipase                                               | 10                     |
| Others*                                                                               | 357                    |
| <b>Total records</b>                                                                  | <b>1062</b>            |

\*In the category "Others": use of constituents as a lipase inhibitor; poly(R)-3-hydroxybutyrate (PHB) studies; vaccine production; general studies on proteins; studies with liposomes; immobilization of other compounds; molecular dynamics simulations with lipase; protease production; use of lipase to agents with functional properties for humans; general studies with microorganisms; synthesis of compounds in general; studies related to diseases in general.

Table S3. Interpretation of Kappa statistic.

| <b>Kappa</b> | <b>Interpretation</b>    |
|--------------|--------------------------|
| <0.0         | No agreement             |
| 0.0 - 0.20   | Slight agreement         |
| 0.21 – 0.40  | Fair agreement           |
| 0.41 – 0.60  | Moderate agreement       |
| 0.61 – 0.80  | Substantial agreement    |
| 0.81 – 1.00  | Almost perfect agreement |

Fonte. Okwuashi *et al.*, 2012.

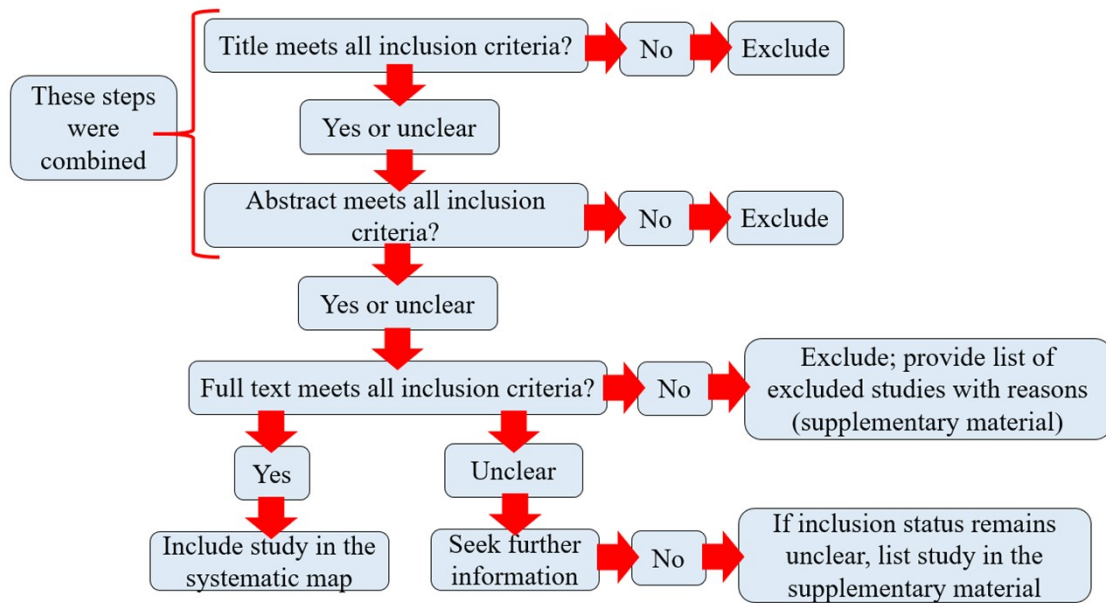

Figure S1. Stages of the literature screening process (Adapted from CEE, 2020; Available at: <http://www.environmentalevidence.org/guidelines/section-6>).

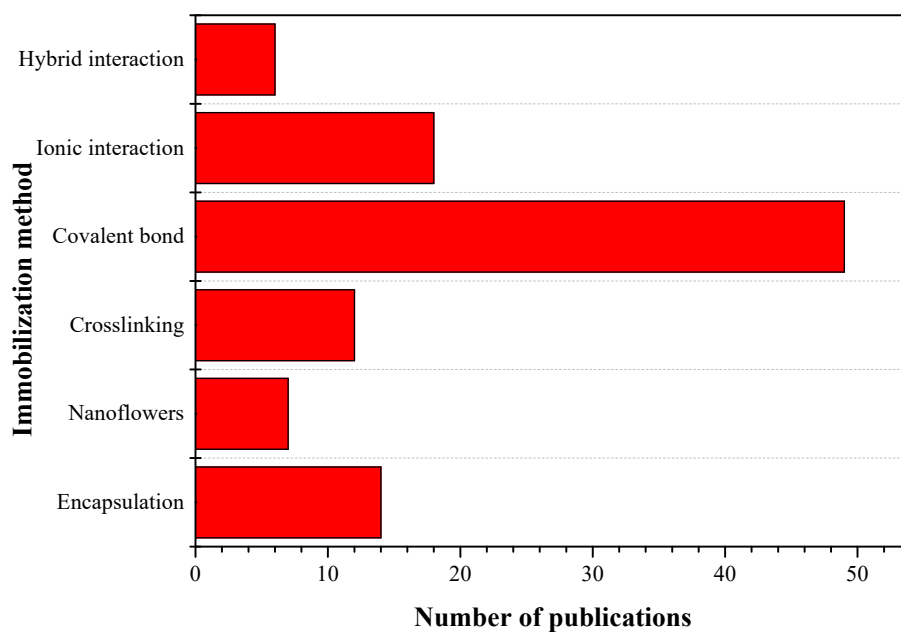

Figure S2. Records eliminated after full-text analysis.

Table S4. Lipases and supports present in our database for systematic mapping analysis.

| Lipase source | Support                                            | Reference |
|---------------|----------------------------------------------------|-----------|
| TLL           | TPEPS-RHS                                          | 1         |
| CRL           | Lifetech™ ECR8804M; Lifetech™ ECR8804M; PMA-co-DVB | 2         |
| BCL           | Accurel MP 1000                                    | 3         |
| CRL           | QCM-D-SAMs                                         | 4         |
| CALB          | MS-3030; OS; SBA-15                                | 5         |
| CRL           | raw-MWCNT                                          | 6         |
| CALB          | OC; OCGLX                                          | 7         |
| PFL           | raw-MWCNT; O-MWCNT                                 | 8         |
| CSL           | PDMS                                               | 9         |
| SPL           | SBA-15@OA                                          | 10        |
| ASL           | PSIWP                                              | 11        |
| CRL; ROL      | Lifetech™ AP1090M; Lifetech™ ECR1030M              | 12        |
| ANL; RAL; CRL | Celite-535                                         | 13        |
| CRL; MJL; CSL | Diaion HP-20                                       | 14        |

|                          |                                                  |    |
|--------------------------|--------------------------------------------------|----|
| BTL2                     | OS; UndGLXS; OS; OCEPX                           | 15 |
| TLL                      | Lifetech™ ECR8806M; EC-OD;<br>Lewatit VP OC 1600 | 16 |
| AOL                      | DCNT-NF90                                        | 17 |
| CVL                      | OC                                               | 18 |
| CRL                      | G; GO                                            | 19 |
| ANL                      | BFN                                              | 20 |
| SHL                      | PMA-co-DVB                                       | 21 |
| CALB                     | POSS                                             | 22 |
| CALB                     | PTFE                                             | 23 |
| CRL                      | PEG-PS-CR                                        | 24 |
| CALB; CCL; PCL; PFL; HPL | ChiS-G                                           | 25 |
| rROL                     | Accurel MP 1000                                  | 26 |
| CALB                     | PS-b-P4VP                                        | 27 |
| CALB                     | OC                                               | 28 |
| TLL                      | GO                                               | 29 |
| CALB                     | MCI GEL CHP20P                                   | 30 |
| PPL                      | Na-bent; Bent-DTAB; Bent-CTAB;<br>Bent-OTAB      | 31 |
| CALB                     | PA-M                                             | 32 |
| RML                      | SBA-15; OCEPX                                    | 33 |
| TLL; LU                  | EC-OD                                            | 34 |
| CRL                      | NMC-MoS <sub>2</sub>                             | 35 |
| RML; TLL; CALB; LU       | OC; PS/PS; PS-co-DVB/PS-co-DVB                   | 36 |
| BSL                      | MSN                                              | 37 |

|                                         |                                                                                                         |    |
|-----------------------------------------|---------------------------------------------------------------------------------------------------------|----|
| TLL                                     | SiO <sub>2</sub> /HPB-MX                                                                                | 38 |
| CRL                                     | OC                                                                                                      | 39 |
| CRL                                     | OC; EC-OD                                                                                               | 40 |
| BCL                                     | SiO <sub>2</sub> -b-CCDT; SiO <sub>2</sub> -CMC; SiO <sub>2</sub> -HEC                                  | 41 |
| GCLI                                    | OC; Diaion HP 2-MG; Diaion HP-20                                                                        | 42 |
| CRL; RML; TLL                           | OCDVS                                                                                                   | 43 |
| CRL; CALB; RAL; ASL; HPL; MML; PCL; RNL | P(SAN-DVB)-HPA; P(SAN-DVB)-GMA                                                                          | 44 |
| CRL                                     | Cell-Fe <sub>2</sub> O <sub>3</sub>                                                                     | 45 |
| CALB                                    | P(MMA-co-C); PMMA-Ncell; PES; P(MMA-co-DMAEMA); P(S-co-DVB-co-GMA); P(S-co-DVB); EC-OD; Accurel MP 1000 | 46 |
| CALB                                    | MCI GEL® CHP20P                                                                                         | 47 |
| TLL                                     | OC                                                                                                      | 48 |
| CALA; CALB; TLL; RML; LU                | OC                                                                                                      | 49 |
| PPL                                     | Chin                                                                                                    | 50 |
| CALB                                    | EC; EC-EDA; EC-IDA; EC-IDA-Cu <sup>2+</sup>                                                             | 51 |
| OPEr                                    | SiMAG-Octyl                                                                                             | 52 |
| PFL                                     | OC                                                                                                      | 53 |
| CALB                                    | P(S-co-DVB); Accurel MP 1000                                                                            | 54 |
| CALB                                    | Accurel MP 1000                                                                                         | 55 |
| TLL                                     | G                                                                                                       | 56 |
| SWL                                     | OC; Immobead 150; MCI GEL® CHP20P                                                                       | 57 |
| CRL; ROL                                | OC                                                                                                      | 58 |
| YILIP2                                  | D3520; D4020; AB-8; NKA                                                                                 | 59 |

|                               |                                                                                                    |    |
|-------------------------------|----------------------------------------------------------------------------------------------------|----|
| CRL                           | MNPs-pAcDED-C8; MNPs-pAcDED-C16                                                                    | 60 |
| BCL                           | MMS                                                                                                | 61 |
| BCL_                          | OS                                                                                                 | 62 |
| RML; TLL; CALB; PFL           | EC-OD                                                                                              | 63 |
| RML; AQL; CALB                | EC-OD                                                                                              | 64 |
| CALB; TLL; LU                 | EC-OD                                                                                              | 65 |
| RML; TLL; CALA; CALB; LU      | Lifetech™ ECR1061M; Lifetech™ ECR8804M; Lifetech™ ECR1090M; Lifetech™ ECR1030M; OC                 | 66 |
| CALA; CALB; CRL; TLL; RML; LU | OC; OCDVS; OCGLX                                                                                   | 67 |
| RML; TLL; CALA; CALB; LU      | Lifetech™ ECR1061M; Lifetech™ ECR8804M; Lifetech™ ECR8806M; Lifetech™ ECR1090M; Lifetech™ ECR1030M | 68 |
| TLL1; TLL2; PFL; BTL2; CALB   | PHB                                                                                                | 69 |
| TLL; RML; LU                  | MCI GEL® CHP20P; OC                                                                                | 70 |
| CALB                          | Accurel MP 1000; PMMA/PMMA; PMMA-co-DVB/PMMA-co-DVB; PS-co-DVB/PS-co-DVB                           | 71 |
| BCL                           | CNF                                                                                                | 72 |
| CRL                           | CN                                                                                                 | 73 |
| LipA; LipC; LipI.3            | Accurel EP100; Accurel MP1000; Celite®545                                                          | 74 |
| CALB                          | Lifetech™ ECR8806M; Lifetech™ ECR 8285F                                                            | 75 |
| CRL                           | Fe <sub>3</sub> O <sub>4</sub> /AgNPs@OA                                                           | 76 |
| TLL                           | PAN                                                                                                | 77 |
| PsL; AsL                      | OS; OGS                                                                                            | 78 |
| TLL                           | Fe <sub>3</sub> O <sub>4</sub> @CA                                                                 | 79 |
| TLL                           | Fe <sub>3</sub> O <sub>4</sub> /Au@OA                                                              | 80 |

|                     |                                                                   |     |
|---------------------|-------------------------------------------------------------------|-----|
| CALB                | raw-MWCNT; NMWCNT; Fe-MWCNT                                       | 81  |
| Lip1, Lip2 and Lip3 | OC; EC-OD                                                         | 82  |
| TLL                 | PCM; Relizyme™ EA 403/S; Relizyme™ HG 403/S                       | 83  |
| CALB                | OSM                                                               | 84  |
| ASP                 | OC; EC-OD                                                         | 85  |
| TLL                 | OC                                                                | 86  |
| CALB                | OC                                                                | 87  |
| CALB                | Fe <sub>3</sub> O <sub>4</sub> @OA                                | 88  |
| TLL                 | EC-OD; Lewatit VP OC 1600; Lifetech™ ECR8806F; Lifetech™ ECR1030M | 89  |
| CALB                | SMMP-octyl; SMMP-octyl-glu                                        | 90  |
| CALB                | SEPMOD; MMTMOD                                                    | 91  |
| CALB; RML; LEU      | OCGLX; OCGLXR                                                     | 92  |
| CRL; LipC12         | OC; Aga-C8-GLU                                                    | 93  |
| CRL                 | SP-PVP; SP-Pst                                                    | 94  |
| TLL; CALB; RML      | Lewatit VP OC 1600; Lifetech™ ECR8806M                            | 95  |
| PHL                 | PS-co-DVB                                                         | 96  |
| TLL                 | PHB; PMA                                                          | 97  |
| BaL                 | GO-NH <sub>2</sub> - PMAO                                         | 98  |
| CALB                | MCI GEL® CHP20P                                                   | 99  |
| CALA                | QCM-D                                                             | 100 |
| BCL                 | MAMCP                                                             | 101 |
| PFL                 | OS                                                                | 102 |



|                   |                                                                                                                                                   |     |
|-------------------|---------------------------------------------------------------------------------------------------------------------------------------------------|-----|
| LipB; CALB        | PMMA/PMMA; PMMA-co-DVB/PMMA-co-DVB; PS-co-DVB/PS-co-DVB                                                                                           | 103 |
| PPL               | OS                                                                                                                                                | 104 |
| CALB              | SBA-15                                                                                                                                            | 105 |
| LU                | CTA                                                                                                                                               | 106 |
| TLL               | PMA                                                                                                                                               | 107 |
| CRL               | GO/ZnO                                                                                                                                            | 108 |
| CRL               | PMPPH/PAN                                                                                                                                         | 109 |
| CALB              | Accurel MP 1000; PMMA-co-DVB/PMMA-co-DVB; PS-co-DVB/PS-co-DVB                                                                                     | 110 |
| CRL               | PS; PhS; OS; ODS                                                                                                                                  | 111 |
| CRL               | rGO                                                                                                                                               | 112 |
| TLL               | OS                                                                                                                                                | 113 |
| GCLI              | PHB                                                                                                                                               | 114 |
| AcSL              | SBA-15@OA                                                                                                                                         | 115 |
| Eversa; Eversa2.0 | Lewatit VP OC 1600; EC-OD; Lifetech™ ECR8804M; Lifetech™ ECR1061M                                                                                 | 116 |
| CALB              | P(S-co-DVB); P(S-co-DVB-co-GMA); P(S-co-DVB-co-PFS); P(S-co-DVB-co-GMA)-BA; P(S-co-DVB-co-PFS)-BA; P(S-co-DVB-co-GMA)-TPh; P(S-co-DVB-co-PFS)-TPh | 117 |
| CRLAYS            | NKA                                                                                                                                               | 118 |
| BBL; FOL          | OC                                                                                                                                                | 119 |
| CALB              | Indion@PA 500                                                                                                                                     | 120 |
| PPL               | PBA-PAD                                                                                                                                           | 121 |
| ROL               | BTS; PhS; BTT; HXT; PhT; OC; EC-OD                                                                                                                | 122 |

|                                       |                                           |     |
|---------------------------------------|-------------------------------------------|-----|
| SWL                                   | OC; BTT                                   | 123 |
| TLL                                   | APS                                       | 124 |
| ANL                                   | UiO-66-PDMS                               | 125 |
| CALB; TLL                             | OCGLX                                     | 126 |
| ANL                                   | OC; EC-OD                                 | 127 |
| RML; TLL; CALB; CRL;<br>ROL; PFL; BTL | OC                                        | 128 |
| CALB                                  | OC                                        | 129 |
| CRL                                   | p-SNPs                                    | 130 |
| CRL; ANL; RAL                         | Celite-535; PE                            | 131 |
| LU; RML; PFL                          | OC; OCGLX                                 | 132 |
| CALA; CALB; TLL; RML;<br>CRL; LU      | OC; OCEDA; OCHDA                          | 133 |
| CALA; CALB; TLL; RML;<br>CRL; LU      | OC; OCGLU                                 | 134 |
| Rrol                                  | RHS; Relizyme™ OD403                      | 135 |
| SHL_ ; CGL; SLL; ZPL;<br>PHL_         | OC                                        | 136 |
| CALB                                  | Accurel MP1001                            | 137 |
| CALB                                  | OC; UndGLX, OCEPX; OS;<br>UndGLXS; OCEPXS | 138 |
| BCL                                   | NWs                                       | 139 |
| CALB                                  | MCI GEL CHP20P; Diaion HP-20              | 140 |
| CRL                                   | Fe <sub>3</sub> O <sub>4</sub> @ZIF-8     | 141 |
| PFL                                   | PE                                        | 142 |
| BCL                                   | Accurel EP 100                            | 143 |
| RML; CRL                              | OC                                        | 144 |
| CALB                                  | EziG Amber                                | 145 |

|                             |                                                              |     |
|-----------------------------|--------------------------------------------------------------|-----|
| CRL                         | PDLLA                                                        | 146 |
| CRL                         | Lifetech™ ECR1030M; Lifetech™<br>ECR8806M; Lifetech™ ECR8285 | 147 |
| CRL                         | PPA                                                          | 148 |
| TLL; CRL; PFL               | OS                                                           | 149 |
| YLIP2                       | PGMA-TAIC-EGDMA                                              | 150 |
| PsL                         | OC; EC-OD                                                    | 151 |
| ArSL                        | FMD                                                          | 152 |
| PFL                         | MCNT                                                         | 153 |
| PsL                         | OS                                                           | 151 |
| BCL                         | PANF                                                         | 154 |
| BPL                         | BCTMAB                                                       | 155 |
| OTL                         | BTS                                                          | 156 |
| CALB                        | PST-300; PST-14                                              | 157 |
| BCL                         | Accurel EP 100                                               | 158 |
| CRL                         | OS; ODS                                                      | 159 |
| TLL; RML                    | EC-OD                                                        | 160 |
| CSL                         | PDMS                                                         | 161 |
| CALB                        | OC                                                           | 162 |
| CRL                         | PVADVBZ                                                      | 163 |
| CRL                         | PBAP-PPMM                                                    | 164 |
| CALB; TLL; RML              | OCGLX                                                        | 165 |
| TLL                         | MNPs                                                         | 166 |
| CALA; CALB; RML; TLL;<br>LU | OC                                                           | 167 |

|                             |                    |     |
|-----------------------------|--------------------|-----|
| RML                         | OC                 | 168 |
| CALB; RML                   | OC                 | 169 |
| CALB                        | OC                 | 170 |
| CALB                        | OC                 | 171 |
| AFE                         | EC-OD              | 172 |
| RML                         | OC                 | 173 |
| CALB                        | OC                 | 174 |
| CALB; TLL; RML              | OC                 | 175 |
| CALA; CALB; TLL; RML;<br>LU | OC; OVS            | 176 |
| LipC12                      | OCA; ODA           | 177 |
| CALB                        | Lewatit VP OC 1600 | 178 |
| CALB                        | OC                 | 179 |
| CALB                        | NKA                | 180 |
| RML                         | OC                 | 181 |
| CALB; TLL; RML              | EC-OD              | 182 |
| CALB                        | OC                 | 183 |
| TLL; RML; CALB              | OC                 | 184 |
| HyPL                        | OC                 | 185 |
| CALB; TLL; RML              | Lewatit VP OC 1600 | 186 |
| TLL                         | EC-OD              | 187 |
| LU                          | OC                 | 188 |
| CALB                        | OS                 | 189 |
| CALA; CALB; RML; TLL;<br>LU | OC                 | 190 |

|                             |                                                                                             |     |
|-----------------------------|---------------------------------------------------------------------------------------------|-----|
| MAS1L                       | XAD1180                                                                                     | 191 |
| CALB                        | OC-SAM; OD-SAM                                                                              | 192 |
| PPL; MJL; CALA; RML;<br>TLL | Diaion HP 2-MG                                                                              | 193 |
| TLL                         | Diaion HP-20                                                                                | 194 |
| TrLL                        | DPEG                                                                                        | 195 |
| AQL                         | MNPs                                                                                        | 196 |
| RML                         | OC                                                                                          | 197 |
| CALB                        | EC-OD                                                                                       | 198 |
| CRL                         | OC-EVAL; UnD-EVAL; OD-EVAL                                                                  | 199 |
| BAYCJ01L                    | Ph-TiO <sub>2</sub>                                                                         | 200 |
| TLL                         | CNT                                                                                         | 201 |
| CRL                         | MSEP                                                                                        | 202 |
| CRL                         | PGMATrp                                                                                     | 203 |
| RML                         | OC                                                                                          | 204 |
| RML; CALB                   | EC-OD                                                                                       | 205 |
| CALB                        | PTMOS                                                                                       | 206 |
| ALL                         | PhS; OC                                                                                     | 207 |
| OTL                         | OC; Lewatit VP OC 1600                                                                      | 208 |
| CALB; RML; TLL              | Lewatit VP OC 1600; EC-OD;<br>Lifetech™ ECR1030M; Lifetech™<br>ECR8806M; Lifetech™ ECR8804M | 209 |
| ANL                         | ZIF-8; ZIF-8-PDMS                                                                           | 210 |
| PCL                         | OC-MCF; Ph-MCF                                                                              | 211 |
| CRL                         | Lifetech™ ECR8806M                                                                          | 212 |

|                 |                                           |     |
|-----------------|-------------------------------------------|-----|
| CRL             | PHB                                       | 213 |
| LipG9           | Accurel MP1000                            | 214 |
| FVL             | OC                                        | 215 |
| PCGL            | OC; PHB; XAD-4                            | 216 |
| CALB            | Purolite@ MN102                           | 217 |
| CRL             | MSU-H                                     | 218 |
| CRL             | OSS                                       | 219 |
| CRL             | MGO                                       | 220 |
| ANL             | CLA                                       | 221 |
| Eversa2.0; CALB | OC                                        | 222 |
| CALB            | MCI GEL CHP20P                            | 223 |
| CALB            | MCM 41                                    | 224 |
| CRL             | PU                                        | 225 |
| PSGL            | BTS; PhS; OC; EC-OD; Lewatit<br>VPOC 1600 | 226 |
| PFL             | OCGLX                                     | 227 |
| BCL             | Chin-PVA                                  | 228 |
| RML; TLL        | M-Davisil R250                            | 229 |
| CALB; RML       | BT-Chin; OC-Chin; OD-Chin                 | 230 |
| CALB            | OC-MNP; OD-MNP                            | 231 |
| CRL; CALA       | OCGLX                                     | 126 |
| TLL; PCL        | OC                                        | 232 |
| MSL             | BTS; PhS; OC                              | 233 |
| PFL             | OS                                        | 234 |

|                |                                                   |     |
|----------------|---------------------------------------------------|-----|
| PFL            | MNPs                                              | 235 |
| PsL            | EC-OD                                             | 236 |
| TLL            | MWCNT                                             | 237 |
| YILIP2         | BC                                                | 238 |
| CALA; CALB     | OC                                                | 239 |
| CALB           | MNPs                                              | 240 |
| AOL            | D3520; NKA                                        | 241 |
| TLL; Eversa2.0 | OC                                                | 242 |
| CSL            | PMOs                                              | 243 |
| HyPL           | PhS; BTS; OC; EC-OD; Lewatit VP<br>OC 1600; MN200 | 244 |
| CRL            | XAD-2; XAD-4; XAD-7; XAD-16;<br>XAD-61; EC-OD     | 245 |
| TLL; PFL       | OS                                                | 246 |
| TLL            | PMO                                               | 247 |
| r27RCL         | BT-SBA-15; OC- SBA-15; EC-OD-<br>SBA-15           | 248 |
| RML; CRL       | OC; OCGLX                                         | 249 |
| CRL            | Fe <sub>3</sub> O <sub>4</sub> @PVBC              | 250 |
| CALB; TLL; RML | OCGLX                                             | 251 |
| YILIP2         | D4020; AB-8                                       | 252 |
| PPL            | Bent-CTAB                                         | 253 |
| PsL; AsL       | OS; OCGLXS                                        | 254 |
| BCL            | NKA                                               | 255 |
| BCL            | NKA                                               | 256 |
| CRL            | OC                                                | 257 |

|                      |                                |     |
|----------------------|--------------------------------|-----|
| Pf2001Δ60            | OC                             | 258 |
| CCL                  | OC                             | 259 |
| CALA; CALB; CRL; RML | OC                             | 260 |
| CALB                 | Accurel MP 1000                | 261 |
| CALB                 | SPRIN actisorb; SPRIN liposorb | 262 |

---

## References

- 1 R. S. Gama, I. C. A. Bolina, É. C. Cren and A. A. Mendes, *Mater. Chem. Phys.*, 2019, **234**, 146–150.
- 2 T. D. Nalder, I. Kurtovic, C. J. Barrow and S. N. Marshall, *Enzyme Microb. Technol.*, 2018, **113**, 18–23.
- 3 E. A. Manoel, M. F. P. Ribeiro, J. C. S. Dos Santos, M. A. Z. Coelho, A. B. C. Simas, R. Fernandez-Lafuente and D. M. G. Freire, *Process Biochem.*, 2015, **50**, 1557–1564.
- 4 P.-C. Chen, X.-J. Huang and Z.-K. Xu, *Phys. Chem. Chem. Phys.*, 2015, **17**, 13457–13465.
- 5 J. A. Laszlo, M. Jackson and R. M. Blanco, *J. Mol. Catal. B Enzym.*, 2011, **69**, 60–65.
- 6 N. Ž. Prlainović, D. I. Bezbradica, Z. D. Knežević-Jugović, S. I. Stevanović, M. L. Avramov Ivić, P. S. Uskoković and D. Ž. Mijin, *J. Ind. Eng. Chem.*, 2013, **19**, 279–285.
- 7 D. B. Hirata, T. L. Albuquerque, N. Rueda, J. M. Sánchez-Montero, E. Garcia-Verdugo, R. Porcar and R. Fernandez-Lafuente, *ChemistrySelect*, 2016, **1**, 3259–3270.
- 8 S. Boncel, A. Zniszczoł, K. Szymańska, J. Mrowiec-Białoń, A. Jarzebski and K. Z. Walczak, *Enzyme Microb. Technol.*, 2013, **53**, 263–270.



- 9 W. Li, H. Shen, Y. Tao, B. Chen and T. Tan, *Process Biochem.*, 2014, **49**, 1488–1496.
- 10 M. Vahidi, S. Imanparast, H. Jahandar, H. Forootanfar, S. Mojtabavi and M. A. Faramarzi, *J. Food Sci. Technol.*, 2021, **58**, 2761–2772.
- 11 A. Gricajeva, S. Kazlauskas, L. Kalėdienė and V. Bendikienė, *Int. J. Biol. Macromol.*, 2018, **108**, 1165–1175.
- 12 M. Koutinas, C. Yiangou, N. M. Osório, K. Ioannou, A. Canet, F. Valero and S. Ferreira-Dias, *Bioresour. Technol.*, 2018, **247**, 496–503.
- 13 A. Rashid, M. Mushtaq, Q. Syed, N. Naz and A. Adnan, *Food Sci. Biotechnol.*, 2018, **27**, 1707–1718.
- 14 M. M. O. Santos, R. S. Gama, I. M. Carvalho Tavares, P. H. Santos, M. S. Gonçalves, M. S. Carvalho, E. V. Barros Vilas Boas, J. R. Oliveira, A. A. Mendes and M. Franco, *Biotechnol. Appl. Biochem.*, 2021, **68**, 538–546.
- 15 N. Guajardo, C. Bernal, L. Wilson and Z. Cabrera, *Catal. Today*, 2015, **255**, 21–26.
- 16 E. A. Silveira, S. Moreno-Perez, A. Basso, S. Serban, R. Pestana-Mamede, P. W. Tardioli, C. Sanchez-Farinas, N. Castejon, G. Fernandez-Lorente, J. Rocha-Martin and J. M. Guisan, *J. Biotechnol.*, 2019, **289**, 126–134.
- 17 H. Zhang, J. Luo, S. Li, Y. Wei and Y. Wan, *Langmuir*, 2018, **34**, 2585–2594.
- 18 A. F. D. Almeida, C. R. F. Terrasan, C. C. Terrone, S. M. Tauk-Tornisielo and E. C. Carmona, *Process Biochem.*, 2018, **65**, 71–80.
- 19 R. A. Silva, M. L. Souza, G. D. Bloisi, P. Corio and D. F. S. Petri, *J. Nanoparticle Res.*, 2015, **17**, 187.
- 20 A. El-Batal, A. Farrag, M. Elsayed and A. El-Khawaga, *Bioengineering*, 2016, **3**, 14.
- 21 S. H. Kim, S.-J. Kim, S. Park and H. K. Kim, *J. Mol. Catal. B Enzym.*, 2013, **85–86**, 10–16.
- 22 J. Zdarta, M. Wysokowski, M. Norman, A. Kołodziejczak-Radzimska, D. Moszyński, H. Maciejewski, H. Ehrlich and T. Jesionowski, *Int. J. Mol. Sci.*, 2016, **17**, 1581.
- 23 A. Szelwicka, A. Kolanowska, P. Latos, S. Jurczyk, S. Boncel and A. Chrobok, *Catal. Sci. Technol.*, 2020, **10**, 3255–3264.
- 24 R. A. Silva, A. M. Carmona-Ribeiro and D. F. S. Petri, *Molecules*, 2014, **19**, 8610–8628.

- 25 M. D. Mello, D. Cordeiro, L. T. Costa and C. Follmer, *Biotechnol. Bioprocess Eng.*, 2013, **18**, 1090–1100.
- 26 A. Dutra Madalozzo, L. Sanvido Muniz, A. M. Baron, L. Piovan, D. Alexander Mitchell and N. Krieger, *Biocatal. Agric. Biotechnol.*, 2014, **3**, 13–19.
- 27 J. Pazol, A. Vázquez and E. Nicolau, *Colloids Surf. B. Biointerfaces*, 2019, **183**, 110418.
- 28 E. Plata, M. Ruiz, J. Ruiz, C. Ortiz, J. J. Castillo and R. Fernández-Lafuente, *Int. J. Mol. Sci.*, 2020, **21**, 6501.
- 29 O. Kalji, Y. Sefidbakht, A. M. Nesterenko, V. Uskoković and S.-O. Ranaei-Siadat, *J. Colloid Interface Sci.*, 2020, **567**, 285–299.
- 30 J. Alves, C. Garcia-Galan, M. Schein, A. Silva, O. Barbosa, M. Ayub, R. Fernandez-Lafuente and R. Rodrigues, *Molecules*, 2014, **19**, 9562–9576.
- 31 H. Dong, Y. Li, J. Li, G. Sheng and H. Chen, *Ind. Eng. Chem. Res.*, 2013, **52**, 9030–9037.
- 32 F. Wang, T. T. Nie, L. L. Shao and Z. Cui, *Biocatal. Biotransformation*, 2014, **32**, 314–326.
- 33 M. Garmroodi, M. Mohammadi, A. Ramazani, M. Ashjari, J. Mohammadi, B. Sabour and M. Yousefi, *Int. J. Biol. Macromol.*, 2016, **86**, 208–215.
- 34 S. Moreno-Perez, D. F. M. Turati, J. P. Borges, P. Luna, F. J. Señorans, J. M. Guisan and G. Fernandez-Lorente, *J. Agric. Food Chem.*, 2017, **65**, 117–122.
- 35 S. Zhang, Q. Deng, H. Shangguan, C. Zheng, J. Shi, F. Huang and B. Tang, *ACS Appl. Mater. Interfaces*, 2020, **12**, 12227–12237.
- 36 E. A. Manoel, M. Pinto, J. C. S. dos Santos, V. G. Tacias-Pascacio, D. M. G. Freire, J. C. Pinto and R. Fernandez-Lafuente, *RSC Adv.*, 2016, **6**, 62814–62824.
- 37 A. H. Morales, J. S. Hero, M. C. Navarro, E. M. Farfán, M. A. Martínez, D. L. Lamas, M. I. Gómez and C. M. Romero, *ChemistrySelect*, 2019, **4**, 11024–11033.
- 38 M. Deon, N. Carminatti Ricardi, R. Carvalho De Andrade, P. F. Hertz, S. Nicolodi, T. M. H. Costa, R. Bussamara, E. V Benvenuto and E. W. De Menezes, *Langmuir*, 2020, **36**, 10147–10155.
- 39 L. Tanzi, M. S. Robescu, S. Marzatico, T. Recca, Y. Zhang, M. Terreni and T. Bavaro, *Molecules*, 2020, **25**, 5764.
- 40 Q. I. Abualassal, K. M. Al Azzam, Z. H. Abudayeh and L. K. Hassouneh, *Adv. Pharm. Bull.*, 2017, **7**, 313–321.
- 41 L. S. Martin, A. Ceron, P. C. Oliveira, G. M. Zanin and H. F. de Castro, *J. Ind.*

- Eng. Chem.*, 2018, **62**, 462–470.
- 42 M. M. Ferreira, F. L. B. Santiago, N. A. G. D. Silva, J. H. H. Luiz, R. Fernández-Lafuente, A. A. Mendes and D. B. Hirata, *Process Biochem.*, 2018, **67**, 55–63.
- 43 T. L. D. Albuquerque, N. Rueda, J. C. S. Dos Santos, O. Barbosa, C. Ortiz, B. Binay, E. Özdemir, L. R. B. Gonçalves and R. Fernandez-Lafuente, *Process Biochem.*, 2016, **51**, 865–874.
- 44 H. Yang, L. Wang, S. Chen, M. Wang and Z. Feng, *Polym. Int.*, 2015, **64**, 915–923.
- 45 S. Park, Y. Oh, D. Jung and S. H. Lee, *Polymers (Basel)*, 2020, **12**, 1869.
- 46 M. C. C. Pinto, S. S. Everton, L. C. M. Cirilo, T. N. de Melo, E. P. Cipolatti, E. A. Manoel, J. C. Pinto and D. M. G. Freire, *Biocatal. Biotransformation*, 2020, **38**, 304–314.
- 47 J. L. R. Friedrich, F. P. Peña, C. Garcia-Galan, R. Fernandez-Lafuente, M. A. Z. Ayub and R. C. Rodrigues, *J. Chem. Technol. Biotechnol.*, 2013, **88**, 1089–1095.
- 48 H. Zaak, E.-H. Siar, J. F. Kornecki, L. Fernandez-Lopez, S. G. Pedrero, J. J. Virgen-Ortiz and R. Fernandez-Lafuente, *Process Biochem.*, 2017, **56**, 117–123.
- 49 L. Fernandez-Lopez, S. G. Pedrero, N. Lopez-Carrobles, B. C. Gorines, J. J. Virgen-Ortiz and R. Fernandez-Lafuente, *Enzyme Microb. Technol.*, 2017, **98**, 18–25.
- 50 S. Y. Zaitsev, A. A. Savina, L. S. Garnashevich, M. S. Tsarkova and I. S. Zaitsev, *Bionanoscience*, 2019, **9**, 773–777.
- 51 O. Barbosa, C. Ortiz, R. Torres and R. Fernandez-Lafuente, *J. Mol. Catal. B Enzym.*, 2011, **71**, 124–132.
- 52 M. Molina-Gutiérrez, N. Hakalin, L. Rodríguez-Sánchez, L. Alcaraz, F. López, M. Martínez and A. Prieto, *Molecules*, 2019, **24**, 1313.
- 53 S. Arana-Peña, N. S. Rios, D. Carballares, C. Mendez-Sanchez, Y. Lokha, L. R. B. Gonçalves and R. Fernandez-Lafuente, *Front. Bioeng. Biotechnol.*, 2020, **8**, 1–13.
- 54 M. C. C. Pinto, N. L. Souza e Castro, E. P. Cipolatti, R. Fernandez-Lafuente, E. A. Manoel, D. M. G. Freire and J. C. Pinto, *Macromol. React. Eng.*, 2020, **14**, 1900054.
- 55 S. Weinberger, A. Pellis, J. Comerford, T. Farmer and G. Guebitz, *Catalysts*, 2018, **8**, 369.
- 56 N. Losada-Garcia, A. Berenguer-Murcia, D. Cazorla-Amorós and J. Palomo,

- Nanomaterials*, 2019, **9**, 1344.
- 57 L. Abreu, R. Fernandez-Lafuente, R. C. Rodrigues, G. Volpato and M. A. Z. Ayub, *J. Mol. Catal. B Enzym.*, 2014, **99**, 51–55.
- 58 M. Yousefi, M. Mohammadi and Z. Habibi, *J. Mol. Catal. B Enzym.*, 2014, **104**, 87–94.
- 59 Y. Yan, X. Zhang and D. Chen, *Bioresour. Technol.*, 2013, **131**, 179–187.
- 60 I. Francolini, V. Taresco, A. Martinelli and A. Piozzi, *Enzyme Microb. Technol.*, 2020, **132**, 109439.
- 61 P. Xue, C.-M. Hu, X.-H. Yan, G.-L. Fang and H.-F. Shen, *J. Chinese Chem. Soc.*, 2019, **66**, 427–433.
- 62 M. L. Verma, W. Azmi and S. S. Kanwar, *Enzyme Res.*, 2011, **2011**, 1–7.
- 63 S. Moreno-Perez, P. Luna, F. J. Señorans, J. M. Guisan and G. Fernandez-Lorente, *Food Chem.*, 2015, **187**, 225–229.
- 64 S. Moreno-Perez, P. Luna, J. Señorans, J. Rocha-Martin, J. M. Guisan and G. Fernandez-Lorente, *Biocatal. Biotransformation*, 2018, **36**, 265–270.
- 65 J. P. Borges, J. C. Quilles Junior, S. Moreno-Perez, G. Fernandez-Lorente, M. Boscolo, E. Gomes, R. da Silva, D. A. Bocchini and J. M. Guisan, *Bioprocess Biosyst. Eng.*, 2020, **43**, 2107–2115.
- 66 V. G. Tacias-Pascacio, S. Peirce, B. Torrestiana-Sanchez, M. Yates, A. Rosales-Quintero, J. J. Virgen-Ortíz and R. Fernandez-Lafuente, *RSC Adv.*, 2016, **6**, 100281–100294.
- 67 D. B. Hirata, T. L. Albuquerque, N. Rueda, J. J. Virgen-Ortíz, V. G. Tacias-Pascacio and R. Fernandez-Lafuente, *J. Mol. Catal. B Enzym.*, 2016, **133**, 117–123.
- 68 V. G. Tacias-Pascacio, J. J. Virgen-Ortíz, M. Jiménez-Pérez, M. Yates, B. Torrestiana-Sanchez, A. Rosales-Quintero and R. Fernandez-Lafuente, *Fuel*, 2017, **200**, 1–10.
- 69 A. A. Mendes, P. C. Oliveira, A. M. Vélez, R. C. Giordano, R. D. L. C. Giordano and H. F. de Castro, *Int. J. Biol. Macromol.*, 2012, **50**, 503–511.
- 70 C. Garcia-Galan, O. Barbosa, K. Hernandez, J. C. S. Dos Santos, R. C. Rodrigues and R. Fernandez-Lafuente, *Molecules*, 2014, **19**, 7629–7645.
- 71 E. A. Manoel, J. M. Robert, M. C. C. Pinto, A. C. O. MacHado, M. D. Besteti, M. A. Z. Coelho, A. B. C. Simas, R. Fernandez-Lafuente, J. C. Pinto and D. M. G. Freire, *RSC Adv.*, 2016, **6**, 4043–4052.

- 72 S. Soni, B. P. Dwivedee and U. Chand Banerjee, *RSC Adv.*, 2018, **8**, 27763–27774.
- 73 W. Shen, L. Ren, H. Zhou, S. Zhang and W. Fan, *J. Mater. Chem.*, 2011, **21**, 3890.
- 74 S. Cesarini, B. Infanzón, F. I. J. Pastor and P. Diaz, *BMC Biotechnol.*, 2014, **14**, 27.
- 75 A. Milivojević, M. Ćorović, M. Simović, K. Banjanac and D. Bezbradica, *Biochem. Eng. J.*, 2020, **163**, 107748.
- 76 M. Sarno and M. Iuliano, *Appl. Surf. Sci.*, 2020, **510**, 145481.
- 77 A. Gupta, S. R. Dhakate, M. Pahwa, S. Sinha, S. Chand and R. B. Mathur, *Process Biochem.*, 2013, **48**, 124–132.
- 78 C. Bernal, A. Illanes and L. Wilson, *Langmuir*, 2014, **30**, 3557–3566.
- 79 M. Sarno, M. Iuliano, M. Polichetti and P. Ciambelli, *Process Biochem.*, 2017, **56**, 98–108.
- 80 M. Sarno and M. Iuliano, *Appl. Surf. Sci.*, 2019, **474**, 135–146.
- 81 M. Markiton, S. Boncel, D. Janas and A. Chrobok, *ACS Sustain. Chem. Eng.*, 2017, **5**, 1685–1691.
- 82 J. Brabcová, Z. Demianová, J. Vondrášek, M. Jágr, M. Zarevúcka and J. M. Palomo, *J. Mol. Catal. B Enzym.*, 2013, **98**, 62–72.
- 83 C. Reichardt, S. Utgenannt, K.-P. Stahmann, O. Klepel and S. Barig, *Biochem. Eng. J.*, 2018, **138**, 63–73.
- 84 O. Fernández, I. Díaz, C. F. Torres, M. Tobajas, V. Tejedor and R. M. Blanco, *Appl. Catal. A Gen.*, 2013, **450**, 204–210.
- 85 M. V. Tacin, T. A. Costa-Silva, A. V. de Paula, J. M. Palomo and V. de C. Santos-Ebinuma, *Prep. Biochem. Biotechnol.*, 2021, **51**, 749–760.
- 86 Y. Lokha, S. Arana-Peña, N. S. Rios, C. Mendez-Sanchez, L. R. B. Gonçalves, F. Lopez-Gallego and R. Fernandez-Lafuente, *Enzyme Microb. Technol.*, 2020, **133**, 109461.
- 87 J. C. J. Quilles, R. R. Brito, J. P. Borges, C. C. Aragon, G. Fernandez-Lorente, D. A. Bocchini-Martins, E. Gomes, R. da Silva, M. Boscolo and J. M. Guisan, *Biochem. Eng. J.*, 2015, **93**, 274–280.
- 88 M. Viñambres, M. Filice and M. Marciello, *Polymers (Basel)*, 2018, **10**, 615.
- 89 E. A. Silveira, S. Moreno-Perez, A. Basso, S. Serban, R. P. Mamede, P. W. Tardioli, C. S. Farinas, J. Rocha-Martin, G. Fernandez-Lorente and J. M. Guisan,

- BMC Biotechnol.*, 2017, **17**, 88.
- 90 L. N. Lima, G. N. A. Vieira, W. Kopp, P. W. Tardioli and R. L. C. Giordano, *J. Mol. Catal. B Enzym.*, 2016, **133**, S491–S499.
- 91 H. Öztürk, E. Pollet, V. Phalip, Y. Güvenilir and L. Avérous, *Polymers (Basel)*., 2016, **8**, 416.
- 92 S. Arana-Peña, C. Mendez-Sanchez, N. S. Rios, C. Ortiz, L. R. B. Gonçalves and R. Fernandez-Lafuente, *Int. J. Biol. Macromol.*, 2019, **131**, 989–997.
- 93 R. R. de Melo, R. C. Alnoch, A. F. L. Vilela, E. M. de Souza, N. Krieger, R. Ruller, H. H. Sato and C. Mateo, *Molecules*, 2017, **22**, 1088.
- 94 S. Zhang, Q. Deng, Y. Li, M. Zheng, C. Wan, C. Zheng, H. Tang, F. Huang and J. Shi, *R. Soc. Open Sci.*, 2018, **5**, 172368.
- 95 E. C. Toro, D. F. Rodríguez, N. Morales, L. M. García and C. A. Godoy, *Catalysts*, 2019, **9**, 546.
- 96 R. Bussamara, L. Dall’Agnol, A. Schrank, K. F. Fernandes and M. H. Vainstein, *Enzyme Res.*, 2012, **2012**, 1–12.
- 97 M. C. C. Corradini, R. A. B. Gomes, J. H. H. Luiz and A. A. Mendes, *Chem. Eng. Commun.*, 2016, **203**, 1432–1442.
- 98 A. Ameri, M. Shakibaie, M. Khoobi, M. A. Faramarzi, E. Gholibegloo, A. Ameri and H. Forootanfar, *Int. J. Biol. Macromol.*, 2020, **162**, 1790–1806.
- 99 J. K. Poppe, C. Garcia-Galan, C. R. Matte, R. Fernandez-Lafuente, R. C. Rodrigues and M. A. Z. Ayub, *J. Mol. Catal. B Enzym.*, 2013, **94**, 51–56.
- 100 P. Joyce, I. Kempson and C. A. Prestidge, *Colloids Surfaces B Biointerfaces*, 2016, **142**, 173–181.
- 101 H. Koga, T. Kitaoka and A. Isogai, *J. Mater. Chem.*, 2012, **22**, 11591–11597.
- 102 L. Lima, A. Mendes, R. Fernandez-Lafuente, P. Tardioli and R. Giordano, *Molecules*, 2018, **23**, 766.
- 103 E. P. Cipolatti, M. C. C. Pinto, J. de M. Robert, T. P. da Silva, T. da C. Beralto, J. G. F. Santos, R. de P. V. de Castro, R. Fernandez-Lafuente, E. A. Manoel, J. C. Pinto and D. M. G. Freire, *J. Appl. Polym. Sci.*, 2018, **135**, 46727.
- 104 V. Vescovi, J. B. C. dos Santos and P. W. Tardioli, *Biocatal. Biotransformation*, 2017, **35**, 298–305.
- 105 N. S. Rios, M. P. Pinheiro, M. L. B. Lima, D. M. G. Freire, I. J. da Silva, E. Rodríguez-Castellón, H. B. de Sant’Ana, A. C. Macedo and L. R. B. Gonçalves, *Chem. Eng. Res. Des.*, 2018, **129**, 12–24.

- 106 F. Silva, W. Morais Júnior, C. Silva, A. Vieira, A. Batista, A. Faria and R. Assunção, *Molecules*, 2017, **22**, 1930.
- 107 F. A. P. Lage, J. J. Bassi, M. C. C. Corradini, L. M. Todero, J. H. H. Luiz and A. A. Mendes, *Enzyme Microb. Technol.*, 2016, **84**, 56–67.
- 108 S. Zhang, J. Shi, Q. Deng, M. Zheng, C. Wan, C. Zheng, Y. Li and F. Huang, *Molecules*, 2017, **22**, 1205.
- 109 S.-G. Wang, X. Jiang, P.-C. Chen, A.-G. Yu and X.-J. Huang, *Int. J. Mol. Sci.*, 2012, **13**, 14136–14148.
- 110 A. G. Cunha, M. D. Besteti, E. A. Manoel, A. A. T. Da Silva, R. V Almeida, A. B. C. Simas, R. Fernandez-Lafuente, J. C. Pinto and D. M. G. Freire, *J. Mol. Catal. B Enzym.*, 2014, **100**, 59–67.
- 111 Z. Dong, M.-Y. Jiang, J. Shi, M.-M. Zheng and F.-H. Huang, *Molecules*, 2019, **24**, 395.
- 112 M. Chen, H. Wu, Z. Li, K. Wu, Y. Jiao and C. Zhou, *Microporous Mesoporous Mater.*, 2020, **294**, 109920.
- 113 N. B. Machado, J. P. Miguez, I. C. A. Bolina, A. B. Salviano, R. A. B. Gomes, O. L. Tavano, J. H. H. Luiz, P. W. Tardioli, É. C. Cren and A. A. Mendes, *Enzyme Microb. Technol.*, 2019, **128**, 9–21.
- 114 E. Z. Ramos, R. H. M. Júnior, P. F. de Castro, P. W. Tardioli, A. A. Mendes, R. Fernández-Lafuente and D. B. Hirata, *J. Mol. Catal. B Enzym.*, 2015, **118**, 43–51.
- 115 S. Imanparast, M. A. Faramarzi and J. Hamed, *Fuel*, 2020, **279**, 118580.
- 116 D. Remonato, J. V. Oliveira, J. M. Guisan, D. Oliveira, J. Ninow and G. Fernandez-Lorente, *Appl. Biochem. Biotechnol.*, 2018, **185**, 705–716.
- 117 M. C. C. Pinto, E. P. Cipolatti, E. A. Manoel, D. M. G. Freire, Ç. R. Becer and J. C. Pinto, *Macromol. Mater. Eng.*, 2020, **305**, 2000065.
- 118 M.-M. Zheng, Q. Huang, F.-H. Huang, P.-M. Guo, X. Xiang, Q.-C. Deng, W.-L. Li, C.-Y. Wan and C. Zheng, *J. Agric. Food Chem.*, 2014, **62**, 5142–5148.
- 119 M. Pérez, E. Gonçalves, J. Salgado, M. Rocha, P. Almeida, A. Vici, J. Infante, J. Guisán, J. Rocha-Martin, B. Pessela and M. Polizeli, *Molecules*, 2018, **23**, 3015.
- 120 M. G. Yadav, R. N. Vadgama, M. R. Kavadia, A. A. Odaneth and A. M. Lali, *Biotechnol. Reports*, 2019, **23**, e00353.
- 121 X. Sun, W. Zhu and K. Matyjaszewski, *Macromolecules*, 2018, **51**, 289–296.
- 122 N. Ghattas, M. Filice, F. Abidi, J. M. Guisan and A. Ben Salah, *J. Mol. Catal. B Enzym.*, 2014, **110**, 111–116.

- 123 G. Volpato, M. Filice, B. de las Rivas, R. C. Rodrigues, J. X. Heck, R. Fernandez-Lafuente, J. M. Guisan, C. Mateo and M. A. Z. Ayub, *Biotechnol. Prog.*, 2011, **27**, 717–723.
- 124 C. Bernal, J. C. Poveda-Jaramillo and M. Mesa, *Chem. Eng. J.*, 2018, **334**, 760–767.
- 125 Y. Hu, L. Dai, D. Liu and W. Du, *Green Chem.*, 2018, **20**, 4500–4506.
- 126 A. Suescun, N. Rueda, J. C. S. Dos Santos, J. J. Castillo, C. Ortiz, R. Torres, O. Barbosa and R. Fernandez-Lafuente, *Process Biochem.*, 2015, **50**, 1211–1217.
- 127 T. Bavaro, P. Torres-Salas, N. Antonioli, C. F. Morelli, G. Speranza and M. Terreni, *ChemCatChem*, 2013, **5**, 2925–2931.
- 128 G. Fernández-Lorente, L. Betancor, A. V Carrascosa and J. M. Guisán, *JAOCS, J. Am. Oil Chem. Soc.*, 2011, **88**, 1173–1178.
- 129 J. J. Virgen-Ortíz, V. G. Tacias-Pascacio, D. B. Hirata, B. Torrestiana-Sanchez, A. Rosales-Quintero and R. Fernandez-Lafuente, *Enzyme Microb. Technol.*, 2017, **96**, 30–35.
- 130 C. Zhang, X. Dong, Z. Guo and Y. Sun, *J. Colloid Interface Sci.*, 2018, **519**, 145–153.
- 131 A. Rashid Choudhry, M. Mushtaq, A. Adnan and Q. Syed, *Biocatal. Biotransformation*, 2017, **35**, 238–248.
- 132 N. Rios, S. Arana-Peña, C. Mendez-Sanchez, C. Ortiz, L. Gonçalves and R. Fernandez-Lafuente, *Catalysts*, 2019, **9**, 487.
- 133 N. Rueda, T. L. Albuquerque, R. Bartolome-Cabrero, L. Fernandez-Lopez, R. Torres, C. Ortiz, J. C. S. Dos Santos, O. Barbosa and R. Fernandez-Lafuente, *Molecules*, 2016, **21**, 646.
- 134 N. Rueda, C. S. Dos Santos, M. D. Rodriguez, T. L. Albuquerque, O. Barbosa, R. Torres, C. Ortiz and R. Fernandez-Lafuente, *J. Mol. Catal. B Enzym.*, 2016, **128**, 10–18.
- 135 K. Bonet-Ragel, L. López-Pou, G. Tutusaus, M. D. Benaiges and F. Valero, *Biocatal. Biotransformation*, 2018, **36**, 151–158.
- 136 A. Del Monte-Martínez, J. González-Bacerio, C. M. Varela, F. Vega-Villasante, R. Lalana-Rueda, H. Nolasco, J. Díaz and J. M. Guisán, *Appl. Biochem. Biotechnol.*, 2019, **189**, 903–918.
- 137 E. Séverac, O. Galy, F. Turon, C. A. Pantel, J.-S. Condoret, P. Monsan and A. Marty, *Enzyme Microb. Technol.*, 2011, **48**, 61–70.



- 138 N. Guajardo, C. Bernal, L. Wilson and Z. Cabrera, *Process Biochem.*, 2015, **50**, 1870–1877.
- 139 Q. Jin, X. Li, C. Deng, Q. Zhang, D. Yi, X. Wang, Y. Tang and Y. Wang, *J. Colloid Interface Sci.*, 2018, **531**, 555–563.
- 140 K. Hernandez, C. Garcia-Galan and R. Fernandez-Lafuente, *Enzyme Microb. Technol.*, 2011, **49**, 72–78.
- 141 Y. Zou, Y. Zhang, X. Liu and H. Zhang, *Catal. Letters*, 2020, **150**, 3608–3616.
- 142 M. Collu, C. Carucci and A. Salis, *Langmuir*, 2020, **36**, 9465–9471.
- 143 A. M. Baron, E. C. Zago, D. A. Mitchell and N. Krieger, *Biocatal. Biotransformation*, 2011, **29**, 19–24.
- 144 L. Fernandez-Lopez, R. Bartolome-Cabrero, M. D. Rodriguez, C. S. Dos Santos, N. Rueda and R. Fernandez-Lafuente, *RSC Adv.*, 2015, **5**, 83868–83875.
- 145 K. E. Cassimjee, P. Hendil-Forsell, A. Volkov, A. Krog, J. Malmo, T. E. V Aune, W. Knecht, I. R. Miskelly, T. S. Moody and M. Svedendahl Humble, *ACS Omega*, 2017, **2**, 8674–8677.
- 146 L. Chronopoulou, G. Kamel, C. Sparago, F. Bordi, S. Lupi, M. Diociaiuti and C. Palocci, *Soft Matter*, 2011, **7**, 2653.
- 147 A. Anand, P. Gnanasekaran, A. M. Allgeier and L. R. Weatherley, *Food Bioprod. Process.*, 2020, **123**, 164–176.
- 148 H. Hilmanto, C. Hidayat and P. Hastuti, *Bull. Chem. React. Eng. Catal.*, 2016, **11**, 339.
- 149 P. A. Mendoza-Ortiz, R. S. Gama, O. C. Gómez, J. H. H. Luiz, R. Fernandez-Lafuente, E. C. Cren and A. A. Mendes, *Catalysts*, 2020, **10**, 218.
- 150 C. Cui, Y. Tao, C. Ge, Y. Zhen, B. Chen and T. Tan, *Colloids Surfaces B Biointerfaces*, 2015, **133**, 51–57.
- 151 C. Tufiño, C. Bernal, C. Ottone, O. Romero, A. Illanes and L. Wilson, *Molecules*, 2019, **24**, 3227.
- 152 Y. Tai, L. Wang, J. Gao, W. Tao, J. Huo and L. Yang, *J. Inorg. Organomet. Polym. Mater.*, 2012, **22**, 213–222.
- 153 K. C. Badgujar, T. Sasaki and B. M. Bhanage, *RSC Adv.*, 2015, **5**, 55238–55251.
- 154 S. Soni, B. P. Dwivedee and U. C. Banerjee, *Int. J. Biol. Macromol.*, 2020, **161**, 573–586.
- 155 H. Dong, Y. Li, G. Sheng and L. Hu, *J. Mol. Catal. B Enzym.*, 2013, **95**, 9–15.
- 156 I. Kurtovic, S. N. Marshall, H. L. Cleaver and M. R. Miller, *Food Chem.*, 2016,

- 199**, 323–329.
- 157 W. Wang, W. Zhou, W. Wei, J. Li, D. Hao, Z. Su and G. Ma, *Polymers (Basel)*, 2016, **8**, 116.
- 158 A. M. Baron, N. Barouh, B. Barea, P. Villeneuve, D. A. Mitchell and N. Krieger, *Fuel*, 2014, **117**, 458–462.
- 159 M.-M. Zheng, T. Sun, Z. Dong, J. Wang and F.-H. Huang, *ACS Sustain. Chem. Eng.*, 2020, **8**, 17280–17290.
- 160 J. C. Quilles Junior, A. L. Ferrarezi, J. P. Borges, J. S. Rossi, D. A. Bocchini, E. Gomes, R. da Silva and M. Boscolo, *Acta Sci. Technol.*, 2019, **42**, e46582.
- 161 B. Chen, C. Yin, Y. Cheng, W. Li, Z.-A. Cao and T. Tan, *Biomass and Bioenergy*, 2012, **39**, 59–66.
- 162 O. Barbosa, R. Torres, C. Ortiz and R. Fernandez-Lafuente, *Process Biochem.*, 2012, **47**, 1220–1227.
- 163 Y. Li, C. Zhang and Y. Sun, *Chinese J. Chem. Eng.*, 2020, **28**, 242–248.
- 164 P.-C. Chen, Y.-C. Qian, F. Fang, X.-Y. Zhu and X.-J. Huang, *Catalysts*, 2016, **6**, 174.
- 165 N. Rueda, J. C. S. Dos Santos, C. Ortiz, O. Barbosa, R. Fernandez-Lafuente and R. Torres, *Catal. Today*, 2016, **259**, 107–118.
- 166 R. O. Henriques, J. A. Bork, G. Fernandez-Lorente, J. M. Guisan, A. Furigo, D. de Oliveira and B. C. Pessela, *Mol. Catal.*, 2018, **453**, 12–21.
- 167 S. Arana-Peña, N. S. Rios, C. Mendez-Sanchez, Y. Lokha, D. Carballares, L. R. B. Gonçalves and R. Fernandez-Lafuente, *Int. J. Biol. Macromol.*, 2020, **145**, 856–864.
- 168 G. Fernandez-Lorente, M. Filice, D. Lopez-Vela, C. Pizarro, L. Wilson, L. Betancor, Y. Avila and J. M. Guisan, *JAACS, J. Am. Oil Chem. Soc.*, 2011, **88**, 801–807.
- 169 J. Virgen-Ortíz, S. Pedrero, L. Fernandez-Lopez, N. Lopez-Carrobles, B. Gorines, C. Otero and R. Fernandez-Lafuente, *Molecules*, 2017, **22**, 91.
- 170 S. Peirce, J. J. Virgen-Ortíz, V. G. Tacias-Pascacio, N. Rueda, R. Bartolome-Cabrero, L. Fernandez-Lopez, M. E. Russo, A. Marzocchella and R. Fernandez-Lafuente, *RSC Adv.*, 2016, **6**, 61707–61715.
- 171 M. L. E. Gutarra, O. Romero, O. Abian, F. A. G. Torres, D. M. G. Freire, A. M. Castro, J. M. Guisan and J. M. Palomo, *ChemCatChem*, 2011, **3**, 1902–1910.
- 172 M. Wang, H. Shi, D. Wu, H. Han, J. Zhang, Z. Xing, S. Wang and Q. Li,

- Molecules*, 2014, **19**, 9838–9849.
- 173 J. Cejudo-Sanches, A. H. Orrego, A. Jaime-Mendoza, R. Ghobadi, S. Moreno-Perez, G. Fernandez-Lorente, J. Rocha-Martin and J. M. Guisan, *Process Biochem.*, 2020, **92**, 156–163.
- 174 O. Barbosa, M. Ruiz, C. Ortiz, M. Fernández, R. Torres and R. Fernandez-Lafuente, *Process Biochem.*, 2012, **47**, 867–876.
- 175 G. Fernández-Lorente, L. Betancor, A. V Carrascosa, J. M. Palomo and J. M. Guisan, *JAOCS, J. Am. Oil Chem. Soc.*, 2012, **89**, 97–102.
- 176 S. Arana-Peña, D. Carballares, V. Cortés Corberan and R. Fernandez-Lafuente, *Catalysts*, 2020, **10**, 1207.
- 177 R. Alnoch, R. R. Melo, J. Palomo, E. M. Souza, N. Krieger and C. Mateo, *Catalysts*, 2016, **6**, 191.
- 178 M. Villalba, C. M. Verdasco-Martín, J. C. S. dos Santos, R. Fernandez-Lafuente and C. Otero, *Enzyme Microb. Technol.*, 2016, **90**, 35–44.
- 179 L. Fernandez-Lopez, J. J. Virgen-Ortíz, S. G. Pedrero, N. Lopez-Carrobbles, B. C. Gorines, C. Otero and R. Fernandez-Lafuente, *Biocatal. Biotransformation*, 2018, **36**, 47–56.
- 180 H. Wang, B. Duan, H. Li, Y. Lu, Z. Liu, W. Su, H. Wang, B. Duan, H. Li, Y. Lu, Z. Liu, W. Su and S. Li, *New J. Chem.*, 2020, **44**, 3463–3470.
- 181 L. Fernandez-Lopez, S. G. Pedrero, N. Lopez-Carrobbles, J. J. Virgen-Ortíz, B. C. Gorines, C. Otero and R. Fernandez-Lafuente, *Process Biochem.*, 2017, **54**, 81–88.
- 182 S. Moreno-Pérez, J. M. Guisan and G. Fernandez-Lorente, *JAOCS, J. Am. Oil Chem. Soc.*, 2014, **91**, 63–69.
- 183 S. Peirce, V. Tacias-Pascacio, M. Russo, A. Marzocchella, J. Virgen-Ortíz and R. Fernandez-Lafuente, *Molecules*, 2016, **21**, 751.
- 184 A. Orrego, R. Ghobadi, S. Moreno-Perez, A. Mendoza, G. Fernandez-Lorente, J. Guisan and J. Rocha-Martin, *Int. J. Mol. Sci.*, 2018, **19**, 553.
- 185 M. G. Pereira, F. D. A. Facchini, A. M. Polizeli, A. C. Vici, J. A. Jorge, B. C. Pessela, G. Fernández-Lorente, J. M. Guisán and M. de L. T. de Moraes Polizeli, *J. Mol. Catal. B Enzym.*, 2015, **121**, 82–89.
- 186 S. Moreno-Perez, M. Filice, J. M. Guisan and G. Fernandez-Lorente, *Chem. Phys. Lipids*, 2013, **174**, 48–54.
- 187 N. Castejón, S. Moreno-Pérez, E. A. Silveira, G. Fernández-Lorente, J. M.

- Guisán and F. J. Señoráns, *Food Chem.*, 2019, **271**, 433–439.
- 188 C. Garcia-Galan, J. C. S. dos Santos, O. Barbosa, R. Torres, E. B. Pereira, V. C. Corberan, L. R. B. Gonçalves and R. Fernandez-Lafuente, *Process Biochem.*, 2014, **49**, 604–616.
- 189 R. M. Blanco and I. Roldán, *Biocatal. Biotransformation*, 2018, **36**, 224–232.
- 190 S. Arana-Peña, N. S. Rios, C. Mendez-Sanchez, Y. Lokha, L. R. B. Gonçalves and R. Fernández-Lafuente, *Enzyme Microb. Technol.*, 2020, **137**, 109535.
- 191 X. Wang, X. Qin, X. Li, Z. Zhao, B. Yang and Y. Wang, *Molecules*, 2019, **24**, 3528.
- 192 T. Zisis, P. L. Freddolino, P. Turunen, M. C. F. Van Teeseling, A. E. Rowan and K. G. Blank, *Biochemistry*, 2015, **54**, 5969–5979.
- 193 J. J. Bassi, L. M. Toderó, F. A. P. Lage, G. I. Khedy, J. D. Ducas, A. P. Custódio, M. A. Pinto and A. A. Mendes, *Int. J. Biol. Macromol.*, 2016, **92**, 900–909.
- 194 M. D. Alves, F. M. Aracri, É. C. Cren and A. A. Mendes, *Chem. Eng. J.*, 2017, **311**, 1–12.
- 195 Y. Zhang, Y. Zhao, X. Gao, W. Jiang, Z. Li, Q. Yao, F. Yang, F. Wang and J. Liu, *Mol. Catal.*, 2019, **466**, 146–156.
- 196 E. Xun, Z. Wang, J. Zhao and J. Guo, *J. Chem. Technol. Biotechnol.*, 2015, **90**, 492–499.
- 197 A. Acosta, M. Filice, G. Fernandez-Lorente, J. M. Palomo and J. M. Guisan, *Bioresour. Technol.*, 2011, **102**, 507–512.
- 198 K. Hernandez and R. Fernandez-Lafuente, *Process Biochem.*, 2011, **46**, 873–878.
- 199 M. Bellusci, I. Francolini, A. Martinelli, L. D’Ilario and A. Piozzi, *Biomacromolecules*, 2012, **13**, 805–813.
- 200 Z. Gao, J. Chu, T. Jiang, T. Xu, B. Wu and B. He, *Process Biochem.*, 2018, **64**, 152–159.
- 201 G. A. Kovalenko, L. V Perminova, D. V Krasnikov and V. L. Kuznetsov, *J. Porous Mater.*, 2018, **25**, 1017–1026.
- 202 S. Mortazavi and H. Aghaei, *Int. J. Biol. Macromol.*, 2020, **164**, 1–12.
- 203 D. Türkmen, N. Bereli, A. Derazshamshir, I. Perçin, H. Shaikh and F. Yilmaz, *Colloids Surfaces B Biointerfaces*, 2015, **130**, 61–68.
- 204 G. Fernández-Lorente, C. Pizarro, D. López-Vela, L. Betancor, A. V. Carrascosa, B. Pessela and J. M. Guisan, *J. Am. Oil Chem. Soc.*, 2011, **88**, 819–826.
- 205 K. Hernandez, E. Garcia-Verdugo, R. Porcar and R. Fernandez-Lafuente, *Enzyme*

- Microb. Technol.*, 2011, **48**, 510–517.
- 206 Z. Boros, D. Weiser, M. Márkus, E. Abaháziová, Á. Magyar, A. Tomin, B. Koczka, P. Kovács and L. Poppe, *Process Biochem.*, 2013, **48**, 1039–1047.
- 207 J. C. Quilles Junior, A. L. Ferrarezi, J. P. Borges, R. R. Brito, E. Gomes, R. da Silva, J. M. Guisán and M. Boscolo, *Bioprocess Biosyst. Eng.*, 2016, **39**, 1933–1943.
- 208 I. Kurtovic, S. N. Marshall and X. Zhao, *J. Mol. Catal. B Enzym.*, 2011, **72**, 168–174.
- 209 A. Basso, M. Hesseler and S. Serban, *Tetrahedron*, 2016, **72**, 7323–7328.
- 210 Y. Hu, L. Dai, D. Liu and W. Du, *Biotechnol. Biofuels*, , DOI:10.1186/s13068-020-01724-w.
- 211 Q. Jin, G. Jia, Y. Zhang, Q. Yang and C. Li, *Langmuir*, 2011, **27**, 12016–12024.
- 212 I. Kurtovic, T. D. Nalder, H. Cleaver and S. N. Marshall, *Biotechnol. Reports*, 2020, **28**, e00535.
- 213 N. Binhayeeding, T. Yunu, N. Pichid, S. Klomklao and K. Sangkharak, *Process Biochem.*, 2020, **95**, 174–185.
- 214 R. C. Alnoch, V. P. Martini, A. Glogauer, A. C. dos S. Costa, L. Piovan, M. Muller-Santos, E. M. de Souza, F. de Oliveira Pedrosa, D. A. Mitchell and N. Krieger, *PLoS One*, 2015, **10**, 1–18.
- 215 F. Facchini, M. Pereira, A. Vici, M. Filice, B. Pessela, J. Guisan, G. Fernandez-Lorente and M. Polizeli, *Catalysts*, 2018, **8**, 84.
- 216 A. A. Mendes, L. Freitas, A. K. F. de Carvalho, P. C. de Oliveira and H. F. de Castro, *Enzyme Res.*, 2011, **2011**, 1–8.
- 217 M. Ćorović, M. Mihailović, K. Banjanac, M. Carević, A. Milivojević, N. Milosavić and D. Bezbradica, *Bioprocess Biosyst. Eng.*, 2017, **40**, 23–34.
- 218 W. H. Yu, M. Fang, D. S. Tong, P. Shao, T. N. Xu and C. H. Zhou, *Biochem. Eng. J.*, 2013, **70**, 97–105.
- 219 M.-M. Zheng, Y. Lu, L. Dong, P.-M. Guo, Q.-C. Deng, W.-L. Li, Y.-Q. Feng and F.-H. Huang, *Bioresour. Technol.*, 2012, **115**, 141–146.
- 220 W. Xie and M. Huang, *Energy Convers. Manag.*, 2018, **159**, 42–53.
- 221 K. Ward, J. Xi and D. C. Stuckey, *Colloids Surfaces B Biointerfaces*, 2015, **136**, 424–430.
- 222 S. Arana-Peña, Y. Lokha and R. Fernández-Lafuente, *Catalysts*, 2018, **8**, 511.
- 223 N. G. Graebin, A. B. Martins, A. S. G. Lorenzoni, C. Garcia-Galan, R.

- Fernandez-Lafuente, M. A. Z. Ayub and R. C. Rodrigues, *Biotechnol. Prog.*, 2012, **28**, 406–412.
- 224 R. R. Souza, R. D. M. Ferreira and E. B. Tambourgi, *Chem. Eng. Trans.*, 2014, **37**, 565–570.
- 225 M. Guncheva, E. Tashev, D. Zhiryakova, T. Tosheva and N. Tzokova, *Process Biochem.*, 2011, **46**, 923–930.
- 226 D. Turati, W. Morais Júnior, C. Terrasan, S. Moreno-Perez, B. Pessela, G. Fernandez-Lorente, J. Guisan and E. Carmona, *Molecules*, 2017, **22**, 339.
- 227 N. S. Rios, C. Mendez-Sanchez, S. Arana-Peña, N. Rueda, C. Ortiz, L. R. B. Gonçalves and R. Fernandez-Lafuente, *Biochim. Biophys. Acta - Proteins Proteomics*, 2019, **1867**, 741–747.
- 228 K. C. Badgujar and B. M. Bhanage, *Process Biochem.*, 2015, **50**, 1224–1236.
- 229 L. Nagy-Gyor, Z. Boros and L. Poppe, *Period. Polytech. Chem. Eng.*, 2013, **57**, 37–40.
- 230 P. Urrutia, R. Arrieta, L. Alvarez, C. Cardenas, M. Mesa and L. Wilson, *Int. J. Biol. Macromol.*, 2018, **108**, 674–686.
- 231 J. Wang, G. Meng, K. Tao, M. Feng, X. Zhao, Z. Li, H. Xu, D. Xia and J. R. Lu, *PLoS One*, 2012, **7**, e43478.
- 232 E. A. Manoel, J. C. S. dos Santos, D. M. G. Freire, N. Rueda and R. Fernandez-Lafuente, *Enzyme Microb. Technol.*, 2015, **71**, 53–57.
- 233 L. Souza, S. Moreno-Perez, G. Fernández Lorente, E. Cipolatti, D. de Oliveira, R. Resende and B. Pessela, *Molecules*, 2017, **22**, 1508.
- 234 L. N. Lima, G. C. Oliveira, M. J. Rojas, H. F. Castro, P. C. M. Da Rós, A. A. Mendes, R. L. C. Giordano and P. W. Tardioli, *J. Ind. Microbiol. Biotechnol.*, 2015, **42**, 523–535.
- 235 E.-N. Xun, X.-L. Lv, W. Kang, J.-X. Wang, H. Zhang, L. Wang and Z. Wang, *Appl. Biochem. Biotechnol.*, 2012, **168**, 697–707.
- 236 N. Fauré and A. Illanes, *Appl. Biochem. Biotechnol.*, 2011, **165**, 1332–1341.
- 237 N. Matuog, K. Li and Y. Yan, *Mater. Res. Express*, 2017, **4**, 125402.
- 238 X. Zhou, Q. Gao, W. Feng and K. Pan, *Chem. Eng. Technol.*, 2013, **36**, 1249–1254.
- 239 S. Arana-Peña, Y. Lokha and R. Fernández-Lafuente, *Biotechnol. Prog.*, 2019, **35**, 1–8.
- 240 N. SreeHarsha, R. V Ghorpade, A. M. Alzahrani, B. E. Al-Dhubiab and K. N.

- Venugopala, *Int. J. Nanomedicine*, 2019, **14**, 3235–3244.
- 241 H. Cai, Y. Li, M. Zhao, G. Fu, J. Lai and F. Feng, *PLoS One*, 2015, **10**, 1–19.
- 242 J. A. Martínez-Sánchez, S. Arana-Peña, D. Carballares, M. Yates, C. Otero and R. Fernandez-Lafuente, *Catalysts*, 2020, **10**, 738.
- 243 B. Zhao, X. Liu, Y. Jiang, L. Zhou, Y. He and J. Gao, *Appl. Biochem. Biotechnol.*, 2014, **173**, 1802–1814.
- 244 M. G. Pereira, F. D. A. Facchini, L. E. C. Filó, A. M. Polizeli, A. C. Vici, J. A. Jorge, G. Fernandez-Lorente, B. C. Pessela, J. M. Guisan and M. D. L. T. D. M. Polizeli, *Process Biochem.*, 2015, **50**, 561–570.
- 245 P. Winayanuwattikun, C. Kaewpiboon, K. Piriyananon, W. Chulalaksananukul, T. Yongvanich and J. Svasti, *African J. Biotechnol.*, 2011, **10**, 1666–1673.
- 246 V. Vescovi, R. Giordano, A. Mendes and P. Tardioli, *Molecules*, 2017, **22**, 212.
- 247 Z. Zhou, A. Inayat, W. Schwieger and M. Hartmann, *Microporous Mesoporous Mater.*, 2012, **154**, 133–141.
- 248 W.-B. Jin, Y. Xu and X.-W. Yu, *New J. Chem.*, 2019, **43**, 364–370.
- 249 L. Fernandez-Lopez, N. Rueda, R. Bartolome-Cabrero, M. D. Rodriguez, T. L. Albuquerque, J. C. S. Dos Santos, O. Barbosa and R. Fernandez-Lafuente, *Process Biochem.*, 2016, **51**, 48–52.
- 250 Z. Chen, L. Liu and R. Yang, *RSC Adv.*, 2017, **7**, 35169–35174.
- 251 N. Rueda, J. C. S. Dos Santos, R. Torres, C. Ortiz, O. Barbosa and R. Fernandez-Lafuente, *RSC Adv.*, 2015, **5**, 11212–11222.
- 252 Y. Liu, C. Guo, X.-T. Sun and C.-Z. Liu, *Bioresour. Technol.*, 2013, **142**, 415–419.
- 253 H. Dong, J. Li, Y. Li, L. Hu and D. Luo, *Chem. Eng. J.*, 2012, **181–182**, 590–596.
- 254 C. Bernal, A. Illanes and L. Wilson, *J. Agric. Food Chem.*, 2015, **63**, 3716–3724.
- 255 X. Li, S. Huang, L. Xu and Y. Yan, *BMC Biotechnol.*, 2013, **13**, 92.
- 256 T. Liu, Y. Liu, X. Wang, Q. Li, J. Wang and Y. Yan, *J. Mol. Catal. B Enzym.*, 2011, **71**, 45–50.
- 257 S. Velasco-Lozano, F. López-Gallego, J. Rocha-Martin, J. M. Guisán and E. Favela-Torres, *J. Mol. Catal. B Enzym.*, 2016, **130**, 32–39.
- 258 R. V Branco, M. L. E. Gutarra, J. M. Guisan, D. M. G. Freire, R. V Almeida and J. M. Palomo, *Biomed Res. Int.*, 2015, **2015**, 1–8.

- 259 C. Pizarro, M. C. Brañes, A. Markovits, G. Fernández-Lorente, J. M. Guisán, R. Chamy and L. Wilson, *J. Mol. Catal. B Enzym.*, 2012, **78**, 111–118.
- 260 J. F. Kornecki, D. Carballares, R. Morellon-Sterling, E. H. Siar, S. Kashefi, M. Chafiaa, S. Arana-Peña, N. S. Rios, L. R. B. Gonçalves and R. Fernandez-Lafuente, *Process Biochem.*, 2020, **95**, 288–296.
- 261 M. C. C. Pinto, D. M. G. Freire and J. C. Pinto, *Molecules*, 2014, **19**, 12509–12530.
- 262 C. José, M. V Toledo, P. Nicolás, V. Lasalle, M. L. Ferreira and L. E. Briand, *Catal. Sci. Technol.*, 2018, **8**, 3513–3526.
